# Supplementary material for: Three-dimensional brain-on-a-chip with an interstitial level of flow and its application as an in vitro model of Alzheimer's disease
Source: Royal Society of Chemistry journal article supplement (doi:10.1039/c4lc00962b), 2014-09-29
Supplement: c4lc00962b1.pdf [file c4lc00962b1.pdf]

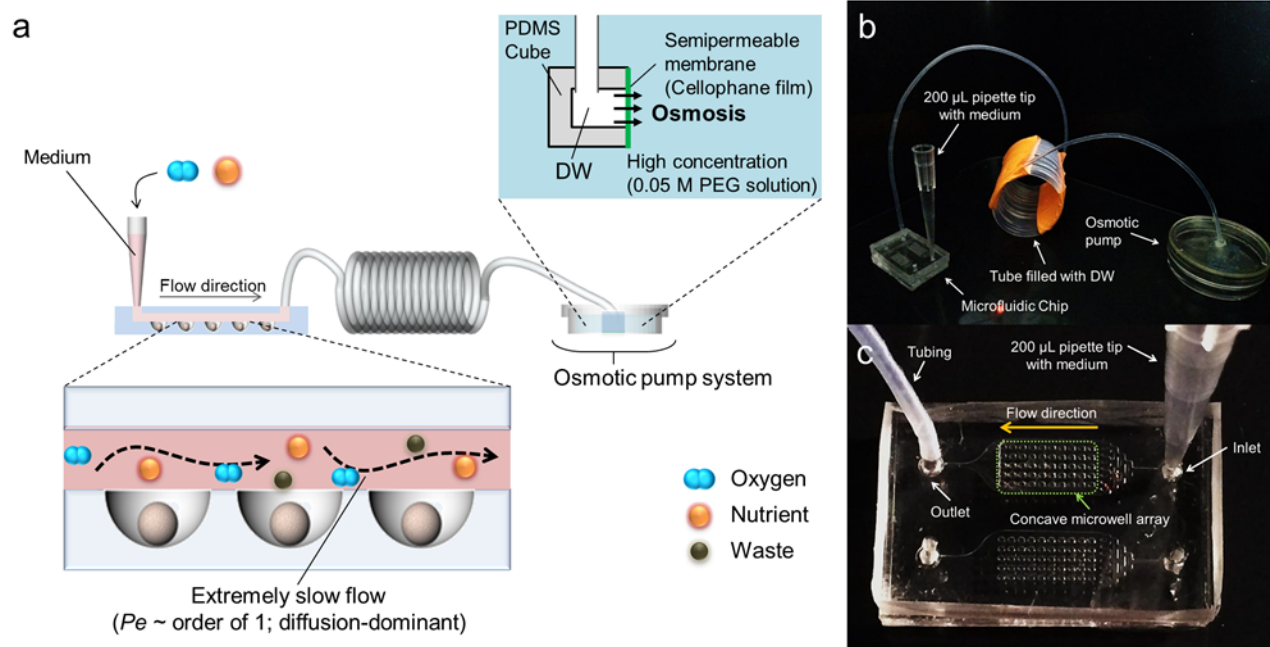

**Figure S1**

Experimental setup of a three-dimensional brain-on-a-chip with an interstitial level of flow. (a) Scheme of experimental setup. The flow is extremely slow flow that is diffusion-dominant and it is driven by osmotic pump system. Osmotic flow through the semipermeable membrane (cellophane film) occurs due to the osmosis between distilled water (DW) and the 0.05M PEG solution having the semipermeable membrane in between. (b) and (c) shows pictures of the experimental setup.
